# Supplementary material for: Light/heat effects on RNA editing in chloroplast NADH-plastoquinone oxidoreductase subunit 2 (ndhB) gene of Calotropis (Calotropis procera)
Source: PubMed Central journal article supplement (PMC7486354; doi:10.1186/s43141-020-00064-4), 2020-09-11
Supplement: 43141_2020_64_MOESM2_ESM.pdf [file 43141_2020_64_MOESM2_ESM.pdf]

|                           |                    |                   |                    |                   |                    |                   |     |
|---------------------------|--------------------|-------------------|--------------------|-------------------|--------------------|-------------------|-----|
|                           |                    | 20                |                    | 40                |                    | 60                |     |
| MK144329                  | <b>ATGATCTGGC</b>  | <b>ATGTACAGAA</b> | <b>TGAAAAC TTC</b> | <b>ATTCTCGATT</b> | <b>CTACGAGAAT</b>  | <b>TTTTATGAAA</b> | 60  |
| MH939982.1:c106394-104178 | .....              | .....             | .....              | .....             | .....              | .....             | 60  |
| MH939981.1:c106661-104445 | .....              | .....             | .....              | .....             | .....              | .....             | 60  |
| KF539850.1:c100173-97957  | .....              | .....             | .....              | .....             | .....              | .....             | 60  |
| MG678915.1:c103141-100925 | .....              | .....             | .....              | .....             | .....              | .....             | 60  |
| MG678876.1:c103509-101293 | .....              | .....             | .....              | .....             | .....              | .....             | 60  |
| MG678856.1:c103368-101152 | .....              | .....             | .....              | .....             | .....              | .....             | 60  |
| MG678843.1:c103267-101051 | .....              | .....             | .....              | .....             | .....              | .....             | 60  |
| MG678835.1:c100962-98746  | .....              | .....             | .....              | .....             | .....              | .....             | 60  |
| KF539853.1:c98719-96503   | .....              | .....             | .....              | .....             | .....              | .....             | 60  |
| KF539852.1:c99164-96948   | .....              | .....             | .....              | .....             | .....              | .....             | 60  |
|                           |                    | 80                |                    | 100               |                    | 120               |     |
| MK144329                  | <b>GCCTTTCATT</b>  | <b>TGCTTCTCTT</b> | <b>CGATGGAAGT</b>  | <b>TTGATTTTCC</b> | <b>CAGAAATGAT</b>  | <b>CCTAATTTTT</b> | 120 |
| MH939982.1:c106394-104178 | .....              | .....             | .....              | .....             | .....              | .....             | 120 |
| MH939981.1:c106661-104445 | .....              | .....             | .....              | .....             | .....              | .....             | 120 |
| KF539850.1:c100173-97957  | .....              | .....             | .....              | .....             | .....              | .....             | 120 |
| MG678915.1:c103141-100925 | .....              | .....             | .....              | .....             | .....              | .....             | 120 |
| MG678876.1:c103509-101293 | .....              | .....             | .....              | .....             | .....              | .....             | 120 |
| MG678856.1:c103368-101152 | .....              | .....             | .....              | .....             | .....              | .....             | 120 |
| MG678843.1:c103267-101051 | .....              | .....             | .....              | .....             | .....              | .....             | 120 |
| MG678835.1:c100962-98746  | .....              | .....             | .....              | .....             | .....              | .....             | 120 |
| KF539853.1:c98719-96503   | .....              | .....             | .....              | .....             | .....              | .....             | 120 |
| KF539852.1:c99164-96948   | .....              | .....             | .....              | .....             | .....              | .....             | 120 |
|                           |                    | 140               |                    | 160               |                    | 180               |     |
| MK144329                  | <b>GGCCTAATTC</b>  | <b>TTCTTTTGAT</b> | <b>GATCGATATA</b>  | <b>ACCTCGGATC</b> | <b>AAAAAGATAT</b>  | <b>ACCTTGTTTA</b> | 180 |
| MH939982.1:c106394-104178 | .....              | .....             | .....              | .....             | .....              | .....             | 180 |
| MH939981.1:c106661-104445 | .....              | .....             | .....              | .....             | .....              | .....             | 180 |
| KF539850.1:c100173-97957  | .....              | .....             | .....              | .....             | .....              | .....             | 180 |
| MG678915.1:c103141-100925 | .....              | .....             | .....              | .....             | .....              | .....             | 180 |
| MG678876.1:c103509-101293 | .....              | .....             | .....              | .....             | .....              | .....             | 180 |
| MG678856.1:c103368-101152 | .....              | .....             | .....              | .....             | .....              | .....             | 180 |
| MG678843.1:c103267-101051 | .....              | .....             | .....              | .....             | .....              | .....             | 180 |
| MG678835.1:c100962-98746  | .....              | .....             | .....              | .....             | .....              | .....             | 180 |
| KF539853.1:c98719-96503   | .....              | .....             | .....              | .....             | .....              | .....             | 180 |
| KF539852.1:c99164-96948   | .....              | .....             | .....              | .....             | .....              | .....             | 180 |
|                           |                    | 200               |                    | 220               |                    | 240               |     |
| MK144329                  | <b>TATTTTCATCT</b> | <b>CTTCAACAAG</b> | <b>TTTAGTAATG</b>  | <b>AGCATAACGG</b> | <b>CCCTATTGTT</b>  | <b>CCGATGGAGA</b> | 240 |
| MH939982.1:c106394-104178 | .....              | .....             | .....              | .....             | .....              | .....             | 240 |
| MH939981.1:c106661-104445 | .....              | .....             | .....              | .....             | .....              | .....             | 240 |
| KF539850.1:c100173-97957  | .....              | .....             | .....              | .....             | .....              | .....             | 240 |
| MG678915.1:c103141-100925 | .....              | .....             | .....              | .....             | .....              | .....             | 240 |
| MG678876.1:c103509-101293 | .....              | .....             | .....              | .....             | .....              | .....             | 240 |
| MG678856.1:c103368-101152 | .....              | .....             | .....              | .....             | .....              | .....             | 240 |
| MG678843.1:c103267-101051 | .....              | .....             | .....              | .....             | .....              | .....             | 240 |
| MG678835.1:c100962-98746  | .....              | .....             | .....              | .....             | .....              | .....             | 240 |
| KF539853.1:c98719-96503   | .....              | .....             | .....              | .....             | .....              | .....             | 240 |
| KF539852.1:c99164-96948   | .....              | .....             | .....              | .....             | .....              | .....             | 240 |
|                           |                    | 260               |                    | 280               |                    | 300               |     |
| MK144329                  | <b>GAAGAACCTA</b>  | <b>TGATTAGCTT</b> | <b>TTCGGGAAAT</b>  | <b>TTCCAAACGA</b> | <b>ACAAATTTCAA</b> | <b>CGAAATCTTT</b> | 300 |
| MH939982.1:c106394-104178 | .....              | .....             | .....              | .....             | .....              | .....             | 300 |
| MH939981.1:c106661-104445 | .....              | .....             | .....              | .....             | .....              | .....             | 300 |
| KF539850.1:c100173-97957  | .....              | .....             | .....              | .....             | .....              | .....             | 300 |
| MG678915.1:c103141-100925 | .....              | .....             | .....              | .....             | .....              | .....             | 300 |
| MG678876.1:c103509-101293 | .....              | .....             | .....              | .....             | .....              | .....             | 300 |
| MG678856.1:c103368-101152 | .....              | .....             | .....              | .....             | .....              | .....             | 300 |
| MG678843.1:c103267-101051 | .....              | .....             | .....              | .....             | .....              | .....             | 300 |
| MG678835.1:c100962-98746  | .....              | .....             | .....              | .....             | .....              | .....             | 300 |
| KF539853.1:c98719-96503   | .....              | .....             | .....              | .....             | .....              | .....             | 300 |
| KF539852.1:c99164-96948   | .....              | .....             | .....              | .....             | .....              | .....             | 300 |
|                           |                    | 320               |                    | 340               |                    | 360               |     |
| MK144329                  | <b>CAATTTCTTA</b>  | <b>TTTTACTATG</b> | <b>TTCAACTCTA</b>  | <b>TGTATTCCTC</b> | <b>TATCCGTAGA</b>  | <b>GTACATTGAA</b> | 360 |
| MH939982.1:c106394-104178 | .....              | .....             | .....              | .....             | .....              | .....             | 360 |
| MH939981.1:c106661-104445 | .....              | .....             | .....              | .....             | .....              | .....             | 360 |
| KF539850.1:c100173-97957  | .....              | .....             | .....              | .....             | .....              | .....             | 360 |
| MG678915.1:c103141-100925 | .....              | .....             | .....              | .....             | .....              | .....             | 360 |
| MG678876.1:c103509-101293 | .....              | .....             | .....              | .....             | .....              | .....             | 360 |
| MG678856.1:c103368-101152 | .....              | .....             | .....              | .....             | .....              | .....             | 360 |
| MG678843.1:c103267-101051 | .....              | .....             | .....              | .....             | .....              | .....             | 360 |
| MG678835.1:c100962-98746  | .....              | .....             | .....              | .....             | .....              | .....             | 360 |
| KF539853.1:c98719-96503   | .....              | .....             | .....              | .....             | .....              | .....             | 360 |
| KF539852.1:c99164-96948   | .....              | .....             | .....              | .....             | .....              | .....             | 360 |

|                           |                   |                   |                    |                   |                   |                   |     |
|---------------------------|-------------------|-------------------|--------------------|-------------------|-------------------|-------------------|-----|
|                           |                   | 380               |                    | 400               |                   | 420               |     |
|                           |                   |                   |                    |                   |                   |                   |     |
| MK144329                  | <b>TGTACAGAAA</b> | <b>TGGCTATAAC</b> | <b>AGAGTTTCTC</b>  | <b>TTATTCGTAT</b> | <b>TAACAGCTAC</b> | <b>TCTGGGAGGA</b> | 420 |
| MH939982.1:c106394-104178 | .....             | .....             | .....              | .....             | .....             | .....             | 420 |
| MH939981.1:c106661-104445 | .....             | .....             | .....              | .....             | .....             | .....             | 420 |
| KF539850.1:c100173-97957  | .....             | .....             | .....              | .....             | .....             | .....             | 420 |
| MG678915.1:c103141-100925 | .....             | .....             | .....              | .....             | .....             | .....             | 420 |
| MG678876.1:c103509-101293 | .....             | .....             | .....              | .....             | .....             | .....             | 420 |
| MG678856.1:c103368-101152 | .....             | .....             | .....              | .....             | .....             | .....             | 420 |
| MG678843.1:c103267-101051 | .....             | .....             | .....              | .....             | .....             | .....             | 420 |
| MG678835.1:c100962-98746  | .....             | .....             | .....              | .....             | .....             | .....             | 420 |
| KF539853.1:c98719-96503   | .....             | .....             | .....              | .....             | .....             | .....             | 420 |
| KF539852.1:c99164-96948   | .....             | .....             | .....              | .....             | .....             | .....             | 420 |
|                           |                   | 440               |                    | 460               |                   | 480               |     |
|                           |                   |                   |                    |                   |                   |                   |     |
| MK144329                  | <b>ATGTTTTTAT</b> | <b>GCGGTGCTAA</b> | <b>CGATTTTCATA</b> | <b>ACTATCTTTG</b> | <b>TAGCTCCAGA</b> | <b>ATGTTTCAGT</b> | 480 |
| MH939982.1:c106394-104178 | .....             | .....             | .....              | .....             | .....             | .....             | 480 |
| MH939981.1:c106661-104445 | .....             | .....             | .....              | .....             | .....             | .....             | 480 |
| KF539850.1:c100173-97957  | .....             | .....             | .....              | .....             | .....             | .....             | 480 |
| MG678915.1:c103141-100925 | .....             | .....             | .....              | .....             | .....             | .....             | 480 |
| MG678876.1:c103509-101293 | .....             | .....             | .....              | .....             | .....             | .....             | 480 |
| MG678856.1:c103368-101152 | .....             | .....             | .....              | .....             | .....             | .....             | 480 |
| MG678843.1:c103267-101051 | .....             | .....             | .....              | .....             | .....             | .....             | 480 |
| MG678835.1:c100962-98746  | .....             | .....             | .....              | .....             | .....             | .....             | 480 |
| KF539853.1:c98719-96503   | .....             | .....             | .....              | .....             | .....             | .....             | 480 |
| KF539852.1:c99164-96948   | .....             | .....             | .....              | .....             | .....             | .....             | 480 |
|                           |                   | 500               |                    | 520               |                   | 540               |     |
|                           |                   |                   |                    |                   |                   |                   |     |
| MK144329                  | <b>TTATGTTCT</b>  | <b>ACCTATTATC</b> | <b>TGGATATACC</b>  | <b>AAGAAAGATG</b> | <b>TACGGTCTAA</b> | <b>TGAGGCTACT</b> | 540 |
| MH939982.1:c106394-104178 | .....             | .....             | .....              | .....             | .....             | .....             | 540 |
| MH939981.1:c106661-104445 | .....             | .....             | .....              | .....             | .....             | .....             | 540 |
| KF539850.1:c100173-97957  | .....             | .....             | .....              | .....             | .....             | .....             | 540 |
| MG678915.1:c103141-100925 | .....             | .....             | .....              | .....             | .....             | .....             | 540 |
| MG678876.1:c103509-101293 | .....             | .....             | .....              | .....             | .....             | .....             | 540 |
| MG678856.1:c103368-101152 | .....             | .....             | .....              | .....             | .....             | .....             | 540 |
| MG678843.1:c103267-101051 | .....             | .....             | .....              | .....             | .....             | .....             | 540 |
| MG678835.1:c100962-98746  | .....             | .....             | .....              | .....             | .....             | .....             | 540 |
| KF539853.1:c98719-96503   | .....             | .....             | .....              | .....             | .....             | .....             | 540 |
| KF539852.1:c99164-96948   | .....             | .....             | .....              | .....             | .....             | .....             | 540 |
|                           |                   | 560               |                    | 580               |                   | 600               |     |
|                           |                   |                   |                    |                   |                   |                   |     |
| MK144329                  | <b>ATGAAATATT</b> | <b>TACTCATGGG</b> | <b>TGGGGCAAGC</b>  | <b>TCTTCTATT</b>  | <b>TGGTTCATGG</b> | <b>TTTCTCTTGG</b> | 600 |
| MH939982.1:c106394-104178 | .....             | .....             | .....              | .....             | .....             | .....             | 600 |
| MH939981.1:c106661-104445 | .....             | .....             | .....              | .....             | .....             | .....             | 600 |
| KF539850.1:c100173-97957  | .....             | .....             | .....              | .....             | .....             | .....             | 600 |
| MG678915.1:c103141-100925 | .....             | .....             | .....              | .....             | .....             | .....             | 600 |
| MG678876.1:c103509-101293 | .....             | .....             | .....              | .....             | .....             | .....             | 600 |
| MG678856.1:c103368-101152 | .....             | .....             | .....              | .....             | .....             | .....             | 600 |
| MG678843.1:c103267-101051 | .....             | .....             | .....              | .....             | .....             | .....             | 600 |
| MG678835.1:c100962-98746  | .....             | .....             | .....              | .....             | .....             | .....             | 600 |
| KF539853.1:c98719-96503   | .....             | .....             | .....              | .....             | .....             | .....             | 600 |
| KF539852.1:c99164-96948   | .....             | .....             | .....              | .....             | .....             | .....             | 600 |
|                           |                   | 620               |                    | 640               |                   | 660               |     |
|                           |                   |                   |                    |                   |                   |                   |     |
| MK144329                  | <b>CTATATGGTT</b> | <b>CATCCGGGGG</b> | <b>AGAGATCGAG</b>  | <b>CTTCAAGAAA</b> | <b>TAGTGAATGG</b> | <b>TCTTATCAAT</b> | 660 |
| MH939982.1:c106394-104178 | .....             | .....             | .....              | .....             | .....             | .....             | 660 |
| MH939981.1:c106661-104445 | .....             | .....             | .....              | .....             | .....             | .....             | 660 |
| KF539850.1:c100173-97957  | .....             | .....             | .....              | .....             | .....             | .....             | 660 |
| MG678915.1:c103141-100925 | .....             | .....             | .....              | .....             | .....             | .....             | 660 |
| MG678876.1:c103509-101293 | .....             | .....             | .....              | .....             | .....             | .....             | 660 |
| MG678856.1:c103368-101152 | .....             | .....             | .....              | .....             | .....             | .....             | 660 |
| MG678843.1:c103267-101051 | .....             | .....             | .....              | .....             | .....             | .....             | 660 |
| MG678835.1:c100962-98746  | .....             | .....             | .....              | .....             | .....             | .....             | 660 |
| KF539853.1:c98719-96503   | .....             | .....             | .....              | .....             | .....             | .....             | 660 |
| KF539852.1:c99164-96948   | .....             | .....             | .....              | .....             | .....             | .....             | 660 |
|                           |                   | 680               |                    | 700               |                   | 720               |     |
|                           |                   |                   |                    |                   |                   |                   |     |
| MK144329                  | <b>ACACAAATGT</b> | <b>ATAACTCCCC</b> | <b>AGGAATTTCA</b>  | <b>ATTGCGCTCA</b> | <b>TATTCATTAC</b> | <b>TGTAGGAATT</b> | 720 |
| MH939982.1:c106394-104178 | .....             | .....             | .....              | .....             | .....             | .....             | 720 |
| MH939981.1:c106661-104445 | .....             | .....             | .....              | .....             | .....             | .....             | 720 |
| KF539850.1:c100173-97957  | .....             | .....             | .....              | .....             | .....             | .....             | 720 |
| MG678915.1:c103141-100925 | .....             | .....             | .....              | .....             | .....             | .....             | 720 |
| MG678876.1:c103509-101293 | .....             | .....             | .....              | .....             | .....             | .....             | 720 |
| MG678856.1:c103368-101152 | .....             | .....             | .....              | .....             | .....             | .....             | 720 |
| MG678843.1:c103267-101051 | .....             | .....             | .....              | .....             | .....             | .....             | 720 |
| MG678835.1:c100962-98746  | .....             | .....             | .....              | .....             | .....             | .....             | 720 |
| KF539853.1:c98719-96503   | .....             | .....             | .....              | .....             | .....             | .....             | 720 |
| KF539852.1:c99164-96948   | .....             | .....             | .....              | .....             | .....             | .....             | 720 |

|                           |                   |                   |                   |                   |                   |                   |      |
|---------------------------|-------------------|-------------------|-------------------|-------------------|-------------------|-------------------|------|
|                           |                   | 740               |                   | 760               |                   | 780               |      |
| MK144329                  | <b>GGGTTCAAGC</b> | <b>TTTCCCCAGC</b> | <b>CCCTTCTCAT</b> | <b>CAATGGACTC</b> | <b>CTGACGTATA</b> | <b>CGAAGGAGTG</b> | 780  |
| MH939982.1:c106394-104178 | .....             | .....             | .....             | .....             | .....             | .....             | 780  |
| MH939981.1:c106661-104445 | .....             | .....             | .....             | .....             | .....             | .....             | 780  |
| KF539850.1:c100173-97957  | .....             | .....             | .....             | .....             | .....             | .....             | 780  |
| MG678915.1:c103141-100925 | .....             | .....             | .....             | .....             | .....             | .....             | 780  |
| MG678876.1:c103509-101293 | .....             | .....             | .....             | .....             | .....             | .....             | 780  |
| MG678856.1:c103368-101152 | .....             | .....             | .....             | .....             | .....             | .....             | 780  |
| MG678843.1:c103267-101051 | .....             | .....             | .....             | .....             | .....             | .....             | 780  |
| MG678835.1:c100962-98746  | .....             | .....             | .....             | .....             | .....             | .....             | 780  |
| KF539853.1:c98719-96503   | .....             | .....             | .....             | .....             | .....             | .....             | 780  |
| KF539852.1:c99164-96948   | .....             | .....             | .....             | .....             | .....             | .....             | 780  |
|                           |                   | 800               |                   | 820               |                   | 840               |      |
| MK144329                  | <b>CGGTTTCGTT</b> | <b>GAGAAATTC</b>  | <b>TACCTCTCTA</b> | <b>TCTATCTCTA</b> | <b>AGATGTTTGG</b> | <b>ATTTTTCAAA</b> | 840  |
| MH939982.1:c106394-104178 | .....             | .....             | .....             | .....             | .....             | .....             | 840  |
| MH939981.1:c106661-104445 | .....             | .....             | .....             | .....             | .....             | .....             | 840  |
| KF539850.1:c100173-97957  | .....             | .....             | .....             | .....             | .....             | .....             | 840  |
| MG678915.1:c103141-100925 | .....             | .....             | .....             | .....             | .....             | .....             | 840  |
| MG678876.1:c103509-101293 | .....             | .....             | .....             | .....             | .....             | .....             | 840  |
| MG678856.1:c103368-101152 | .....             | .....             | .....             | .....             | .....             | .....             | 840  |
| MG678843.1:c103267-101051 | .....             | .....             | .....             | .....             | .....             | .....             | 840  |
| MG678835.1:c100962-98746  | .....             | .....             | .....             | .....             | .....             | .....             | 840  |
| KF539853.1:c98719-96503   | .....             | .....             | .....             | .....             | .....             | .....             | 840  |
| KF539852.1:c99164-96948   | .....             | .....             | .....             | .....             | .....             | .....             | 840  |
|                           |                   | 860               |                   | 880               |                   | 900               |      |
| MK144329                  | <b>ACTCCATGGA</b> | <b>CATGCAGAAG</b> | <b>AGAAATGCTA</b> | <b>TCCCCACTCG</b> | <b>GACCAAGACA</b> | <b>GAACTTTTAC</b> | 900  |
| MH939982.1:c106394-104178 | .....             | .....             | .....             | .....             | .....             | .....             | 900  |
| MH939981.1:c106661-104445 | .....             | .....             | .....             | .....             | .....             | .....             | 900  |
| KF539850.1:c100173-97957  | .....             | .....             | .....             | .....             | .....             | .....             | 900  |
| MG678915.1:c103141-100925 | .....             | .....             | .....             | .....             | .....             | .....             | 900  |
| MG678876.1:c103509-101293 | .....             | .....             | .....             | .....             | .....             | .....             | 900  |
| MG678856.1:c103368-101152 | .....             | .....             | .....             | .....             | .....             | .....             | 900  |
| MG678843.1:c103267-101051 | .....             | .....             | .....             | .....             | .....             | .....             | 900  |
| MG678835.1:c100962-98746  | .....             | .....             | .....             | .....             | .....             | .....             | 900  |
| KF539853.1:c98719-96503   | .....             | .....             | .....             | .....             | .....             | .....             | 900  |
| KF539852.1:c99164-96948   | .....             | .....             | .....             | .....             | .....             | .....             | 900  |
|                           |                   | 920               |                   | 940               |                   | 960               |      |
| MK144329                  | <b>TTGTTCAAAT</b> | <b>AACAATTAAG</b> | <b>GTGAAGCGGG</b> | <b>GTCAAGAACG</b> | <b>ACGAATCTCT</b> | <b>TTATGATAAA</b> | 960  |
| MH939982.1:c106394-104178 | .....             | .....             | .....             | .....             | .....             | .....             | 960  |
| MH939981.1:c106661-104445 | .....             | .....             | .....             | .....             | .....             | .....             | 960  |
| KF539850.1:c100173-97957  | .....             | .....             | .....             | .....             | .....             | .....             | 960  |
| MG678915.1:c103141-100925 | .....             | .....             | .....             | .....             | .....             | .....             | 960  |
| MG678876.1:c103509-101293 | .....             | .....             | .....             | .....             | .....             | .....             | 960  |
| MG678856.1:c103368-101152 | .....             | .....             | .....             | .....             | .....             | .....             | 960  |
| MG678843.1:c103267-101051 | .....             | .....             | .....             | .....             | .....             | .....             | 960  |
| MG678835.1:c100962-98746  | .....             | .....             | .....             | .....             | .....             | .....             | 960  |
| KF539853.1:c98719-96503   | .....             | .....             | .....             | .....             | .....             | .....             | 960  |
| KF539852.1:c99164-96948   | .....             | .....             | .....             | .....             | .....             | .....             | 960  |
|                           |                   | 980               |                   | 1,000             |                   | 1,020             |      |
| MK144329                  | <b>CAGATCCATT</b> | <b>TTGCAAGTTC</b> | <b>CTTATTACGG</b> | <b>GTAGTTCCTA</b> | <b>CAAAGGATCG</b> | <b>GACTAATGAC</b> | 1020 |
| MH939982.1:c106394-104178 | .....             | .....             | .....             | .....             | .....             | .....             | 1020 |
| MH939981.1:c106661-104445 | .....             | .....             | .....             | .....             | .....             | .....             | 1020 |
| KF539850.1:c100173-97957  | .....             | .....             | .....             | .....             | .....             | .....             | 1020 |
| MG678915.1:c103141-100925 | .....             | .....             | .....             | .....             | .....             | .....             | 1020 |
| MG678876.1:c103509-101293 | .....             | .....             | .....             | .....             | .....             | .....             | 1020 |
| MG678856.1:c103368-101152 | .....             | .....             | .....             | .....             | .....             | .....             | 1020 |
| MG678843.1:c103267-101051 | .....             | .....             | .....             | .....             | .....             | .....             | 1020 |
| MG678835.1:c100962-98746  | .....             | .....             | .....             | .....             | .....             | .....             | 1020 |
| KF539853.1:c98719-96503   | .....             | .....             | .....             | .....             | .....             | .....             | 1020 |
| KF539852.1:c99164-96948   | .....             | .....             | .....             | .....             | .....             | .....             | 1020 |
|                           |                   | 1,040             |                   | 1,060             |                   | 1,080             |      |
| MK144329                  | <b>GTATACAATA</b> | <b>CTTGAATTCT</b> | <b>CGATGTAGAT</b> | <b>GCTACATAGT</b> | <b>TGGTTCTCGT</b> | <b>CCTTCAGAGA</b> | 1080 |
| MH939982.1:c106394-104178 | .....             | .....             | .....             | .....             | .....             | .....             | 1080 |
| MH939981.1:c106661-104445 | .....             | .....             | .....             | .....             | .....             | .....             | 1080 |
| KF539850.1:c100173-97957  | .....             | .....             | .....             | .....             | .....             | .....             | 1080 |
| MG678915.1:c103141-100925 | .....             | .....             | .....             | .....             | .....             | .....             | 1080 |
| MG678876.1:c103509-101293 | .....             | .....             | .....             | .....             | .....             | .....             | 1080 |
| MG678856.1:c103368-101152 | .....             | .....             | .....             | .....             | .....             | .....             | 1080 |
| MG678843.1:c103267-101051 | .....             | .....             | .....             | .....             | .....             | .....             | 1080 |
| MG678835.1:c100962-98746  | .....             | .....             | .....             | .....             | .....             | .....             | 1080 |
| KF539853.1:c98719-96503   | .....             | .....             | .....             | .....             | .....             | .....             | 1080 |
| KF539852.1:c99164-96948   | .....             | .....             | .....             | .....             | .....             | .....             | 1080 |

|                           |                   |                   |                   |                    |                   |                   |      |
|---------------------------|-------------------|-------------------|-------------------|--------------------|-------------------|-------------------|------|
|                           |                   | 1,100             |                   | 1,120              |                   | 1,140             |      |
| MK144329                  | <b>CTACGAGTGT</b> | <b>AATAAGAGCA</b> | <b>TCCGTCGACA</b> | <b>AAAGGATCAC</b>  | <b>CCTAAGATGA</b> | <b>TCATCTCATG</b> | 1140 |
| MH939982.1:c106394-104178 | .....             | .....             | .....             | .....              | .....             | .....             | 1140 |
| MH939981.1:c106661-104445 | .....             | .....             | .....             | .....              | .....             | .....             | 1140 |
| KF539850.1:c100173-97957  | .....             | .....             | .....             | .....              | .....             | .....             | 1140 |
| MG678915.1:c103141-100925 | .....             | .....             | .....             | .....              | .....             | .....             | 1140 |
| MG678876.1:c103509-101293 | .....             | .....             | .....             | .....              | .....             | .....             | 1140 |
| MG678856.1:c103368-101152 | .....             | .....             | .....             | .....              | .....             | .....             | 1140 |
| MG678843.1:c103267-101051 | .....             | .....             | .....             | .....              | .....             | .....             | 1140 |
| MG678835.1:c100962-98746  | .....             | .....             | .....             | .....              | .....             | .....             | 1140 |
| KF539853.1:c98719-96503   | .....             | .....             | .....             | .....              | .....             | .....             | 1140 |
| KF539852.1:c99164-96948   | .....             | .....             | .....             | .....              | .....             | .....             | 1140 |
|                           |                   | 1,160             |                   | 1,180              |                   | 1,200             |      |
| MK144329                  | <b>GCTATTGAGA</b> | <b>ACGAATTAAG</b> | <b>TCAGATGGTT</b> | <b>CTATTTCTCA</b>  | <b>ATCTTTCTGA</b> | <b>CTTGCTTTGC</b> | 1200 |
| MH939982.1:c106394-104178 | .....             | .....             | .....             | .....              | .....             | .....             | 1200 |
| MH939981.1:c106661-104445 | .....             | .....             | .....             | .....              | .....             | .....             | 1200 |
| KF539850.1:c100173-97957  | .....             | .....             | .....             | .....              | .....             | .....             | 1200 |
| MG678915.1:c103141-100925 | .....             | .....             | .....             | .....              | .....             | .....             | 1200 |
| MG678876.1:c103509-101293 | .....             | .....             | .....             | .....              | .....             | .....             | 1200 |
| MG678856.1:c103368-101152 | .....             | .....             | .....             | .....              | .....             | .....             | 1200 |
| MG678843.1:c103267-101051 | .....             | .....             | .....             | .....              | .....             | .....             | 1200 |
| MG678835.1:c100962-98746  | .....             | .....             | .....             | .....              | .....             | .....             | 1200 |
| KF539853.1:c98719-96503   | .....             | .....             | .....             | .....              | .....             | .....             | 1200 |
| KF539852.1:c99164-96948   | .....             | .....             | .....             | .....              | .....             | .....             | 1200 |
|                           |                   | 1,220             |                   | 1,240              |                   | 1,260             |      |
| MK144329                  | <b>TCCTACGGAA</b> | <b>CCAAGGTCGA</b> | <b>AAGGATTGAA</b> | <b>AAAATCAGTC</b>  | <b>ATTCACAACC</b> | <b>ACTGATGAAG</b> | 1260 |
| MH939982.1:c106394-104178 | .....             | .....             | .....             | .....              | .....             | .....             | 1260 |
| MH939981.1:c106661-104445 | .....             | .....             | .....             | .....              | .....             | .....             | 1260 |
| KF539850.1:c100173-97957  | .....             | .....             | .....             | .....              | .....             | .....             | 1260 |
| MG678915.1:c103141-100925 | .....             | .....             | .....             | .....              | .....             | .....             | 1260 |
| MG678876.1:c103509-101293 | .....             | .....             | .....             | .....              | .....             | .....             | 1260 |
| MG678856.1:c103368-101152 | .....             | .....             | .....             | .....              | .....             | .....             | 1260 |
| MG678843.1:c103267-101051 | .....             | .....             | .....             | .....              | .....             | .....             | 1260 |
| MG678835.1:c100962-98746  | .....             | .....             | .....             | .....              | .....             | .....             | 1260 |
| KF539853.1:c98719-96503   | .....             | .....             | .....             | .....              | .....             | .....             | 1260 |
| KF539852.1:c99164-96948   | .....             | .....             | .....             | .....              | .....             | .....             | 1260 |
|                           |                   | 1,280             |                   | 1,300              |                   | 1,320             |      |
| MK144329                  | <b>GATTCCTCGA</b> | <b>AAAGTTAAGG</b> | <b>ATTAGTAATC</b> | <b>CTTTTGTAGAA</b> | <b>ATCGAATGGA</b> | <b>TTCGGTCTTA</b> | 1320 |
| MH939982.1:c106394-104178 | .....             | .....             | .....             | .....              | .....             | .....             | 1320 |
| MH939981.1:c106661-104445 | .....             | .....             | .....             | .....              | .....             | .....             | 1320 |
| KF539850.1:c100173-97957  | .....             | .....             | .....             | .....              | .....             | .....             | 1320 |
| MG678915.1:c103141-100925 | .....             | .....             | .....             | .....              | .....             | .....             | 1320 |
| MG678876.1:c103509-101293 | .....             | .....             | .....             | .....              | .....             | .....             | 1320 |
| MG678856.1:c103368-101152 | .....             | .....             | .....             | .....              | .....             | .....             | 1320 |
| MG678843.1:c103267-101051 | .....             | .....             | .....             | .....              | .....             | .....             | 1320 |
| MG678835.1:c100962-98746  | .....             | .....             | .....             | .....              | .....             | .....             | 1320 |
| KF539853.1:c98719-96503   | .....             | .....             | .....             | .....              | .....             | .....             | 1320 |
| KF539852.1:c99164-96948   | .....             | .....             | .....             | .....              | .....             | .....             | 1320 |
|                           |                   | 1,340             |                   | 1,360              |                   | 1,380             |      |
| MK144329                  | <b>TACATACGCG</b> | <b>AGGAAGGTAA</b> | <b>TCAAAAAAGA</b> | <b>AAGAAGATGA</b>  | <b>GTTCTTCTTT</b> | <b>CTTTTATCAC</b> | 1380 |
| MH939982.1:c106394-104178 | .....             | .....             | .....             | .....              | .....             | .....             | 1380 |
| MH939981.1:c106661-104445 | .....             | .....             | .....             | .....              | .....             | .....             | 1380 |
| KF539850.1:c100173-97957  | .....             | .....             | .....             | .....              | .....             | .....             | 1380 |
| MG678915.1:c103141-100925 | .....             | .....             | .....             | .....              | .....             | .....             | 1380 |
| MG678876.1:c103509-101293 | .....             | .....             | .....             | .....              | .....             | .....             | 1380 |
| MG678856.1:c103368-101152 | .....             | .....             | .....             | .....              | .....             | .....             | 1380 |
| MG678843.1:c103267-101051 | .....             | .....             | .....             | .....              | .....             | .....             | 1380 |
| MG678835.1:c100962-98746  | .....             | .....             | .....             | .....              | .....             | .....             | 1380 |
| KF539853.1:c98719-96503   | .....             | .....             | .....             | .....              | .....             | .....             | 1380 |
| KF539852.1:c99164-96948   | .....             | .....             | .....             | .....              | .....             | .....             | 1380 |
|                           |                   | 1,400             |                   | 1,420              |                   | 1,440             |      |
| MK144329                  | <b>TTAGGAGCCG</b> | <b>TGTGAGATGA</b> | <b>AAGTCTCATG</b> | <b>CACGGTTTTG</b>  | <b>AATGAGAGAA</b> | <b>AGAAGTGAGG</b> | 1440 |
| MH939982.1:c106394-104178 | .....             | .....             | .....             | .....              | .....             | .....             | 1440 |
| MH939981.1:c106661-104445 | .....             | .....             | .....             | .....              | .....             | .....             | 1440 |
| KF539850.1:c100173-97957  | .....             | .....             | .....             | .....              | .....             | .....             | 1440 |
| MG678915.1:c103141-100925 | .....             | .....             | .....             | .....              | .....             | .....             | 1440 |
| MG678876.1:c103509-101293 | .....             | .....             | .....             | .....              | .....             | .....             | 1440 |
| MG678856.1:c103368-101152 | .....             | .....             | .....             | .....              | .....             | .....             | 1440 |
| MG678843.1:c103267-101051 | .....             | .....             | .....             | .....              | .....             | .....             | 1440 |
| MG678835.1:c100962-98746  | .....             | .....             | .....             | .....              | .....             | .....             | 1440 |
| KF539853.1:c98719-96503   | .....             | .....             | .....             | .....              | .....             | .....             | 1440 |
| KF539852.1:c99164-96948   | .....             | .....             | .....             | .....              | .....             | .....             | 1440 |

|                           |                   |                   |                   |                   |                   |                   |      |
|---------------------------|-------------------|-------------------|-------------------|-------------------|-------------------|-------------------|------|
|                           |                   | 1,460             |                   | 1,480             |                   | 1,500             |      |
| MK144329                  | <b>AATCCTCTTT</b> | <b>TCGACTCTGA</b> | <b>CTCTCCCACT</b> | <b>CCAGTCGTTG</b> | <b>CTTTTCTTTC</b> | <b>TGTTACTTCG</b> | 1500 |
| MH939982.1:c106394-104178 | .....             | .....             | .....             | .....             | .....             | .....             | 1500 |
| MH939981.1:c106661-104445 | .....             | .....             | .....             | .....             | .....             | .....             | 1500 |
| KF539850.1:c100173-97957  | .....             | .....             | .....             | .....             | .....             | .....             | 1500 |
| MG678915.1:c103141-100925 | .....             | .....             | .....             | .....             | .....             | .....             | 1500 |
| MG678876.1:c103509-101293 | .....             | .....             | .....             | .....             | .....             | .....             | 1500 |
| MG678856.1:c103368-101152 | .....             | .....             | .....             | .....             | .....             | .....             | 1500 |
| MG678843.1:c103267-101051 | .....             | .....             | .....             | .....             | .....             | .....             | 1500 |
| MG678835.1:c100962-98746  | .....             | .....             | .....             | .....             | .....             | .....             | 1500 |
| KF539853.1:c98719-96503   | .....             | .....             | .....             | .....             | .....             | .....             | 1500 |
| KF539852.1:c99164-96948   | .....             | .....             | .....             | .....             | .....             | .....             | 1500 |
|                           |                   | 1,520             |                   | 1,540             |                   | 1,560             |      |
| MK144329                  | <b>AAAGTAGCTG</b> | <b>CTTCAGCTTT</b> | <b>AGCCACTCGA</b> | <b>ATTTTCGATA</b> | <b>TTCCTTTTAA</b> | <b>TTTCTCATCA</b> | 1560 |
| MH939982.1:c106394-104178 | .....             | .....             | .....             | .....             | .....             | .....             | 1560 |
| MH939981.1:c106661-104445 | .....             | .....             | .....             | .....             | .....             | .....             | 1560 |
| KF539850.1:c100173-97957  | .....             | .....             | .....             | .....             | .....             | .....             | 1560 |
| MG678915.1:c103141-100925 | .....             | .....             | .....             | .....             | .....             | .....             | 1560 |
| MG678876.1:c103509-101293 | .....             | .....             | .....             | .....             | .....             | .....             | 1560 |
| MG678856.1:c103368-101152 | .....             | .....             | .....             | .....             | .....             | .....             | 1560 |
| MG678843.1:c103267-101051 | .....             | .....             | .....             | .....             | .....             | .....             | 1560 |
| MG678835.1:c100962-98746  | .....             | .....             | .....             | .....             | .....             | .....             | 1560 |
| KF539853.1:c98719-96503   | .....             | .....             | .....             | .....             | .....             | .....             | 1560 |
| KF539852.1:c99164-96948   | .....             | .....             | .....             | .....             | .....             | .....             | 1560 |
|                           |                   | 1,580             |                   | 1,600             |                   | 1,620             |      |
| MK144329                  | <b>AACGAATGGC</b> | <b>ATCTTCTTCT</b> | <b>GGAAATCCTA</b> | <b>GCTATTCTTA</b> | <b>GCATGATATT</b> | <b>GGGAAATCTC</b> | 1620 |
| MH939982.1:c106394-104178 | .....             | .....             | .....             | .....             | .....             | .....             | 1620 |
| MH939981.1:c106661-104445 | .....             | .....             | .....             | .....             | .....             | .....             | 1620 |
| KF539850.1:c100173-97957  | .....             | .....             | .....             | .....             | .....             | .....             | 1620 |
| MG678915.1:c103141-100925 | .....             | .....             | .....             | .....             | .....             | .....             | 1620 |
| MG678876.1:c103509-101293 | .....             | .....             | .....             | .....             | .....             | .....             | 1620 |
| MG678856.1:c103368-101152 | .....             | .....             | .....             | .....             | .....             | .....             | 1620 |
| MG678843.1:c103267-101051 | .....             | .....             | .....             | .....             | .....             | .....             | 1620 |
| MG678835.1:c100962-98746  | .....             | .....             | .....             | .....             | .....             | .....             | 1620 |
| KF539853.1:c98719-96503   | .....             | .....             | .....             | .....             | .....             | .....             | 1620 |
| KF539852.1:c99164-96948   | .....             | .....             | .....             | .....             | .....             | .....             | 1620 |
|                           |                   | 1,640             |                   | 1,660             |                   | 1,680             |      |
| MK144329                  | <b>ATTGCTATTA</b> | <b>CTCAAACAAG</b> | <b>CATGAAACGT</b> | <b>ATGCTTGCAT</b> | <b>ATTGCTCCAT</b> | <b>AGGTCAAATC</b> | 1680 |
| MH939982.1:c106394-104178 | .....             | .....             | .....             | .....             | .....             | .....             | 1680 |
| MH939981.1:c106661-104445 | .....             | .....             | .....             | .....             | .....             | .....             | 1680 |
| KF539850.1:c100173-97957  | .....             | .....             | .....             | .....             | .....             | .....             | 1680 |
| MG678915.1:c103141-100925 | .....             | .....             | .....             | .....             | .....             | .....             | 1680 |
| MG678876.1:c103509-101293 | .....             | .....             | .....             | .....             | .....             | .....             | 1680 |
| MG678856.1:c103368-101152 | .....             | .....             | .....             | .....             | .....             | .....             | 1680 |
| MG678843.1:c103267-101051 | .....             | .....             | .....             | .....             | .....             | .....             | 1680 |
| MG678835.1:c100962-98746  | .....             | .....             | .....             | .....             | .....             | .....             | 1680 |
| KF539853.1:c98719-96503   | .....             | .....             | .....             | .....             | .....             | .....             | 1680 |
| KF539852.1:c99164-96948   | .....             | .....             | .....             | .....             | .....             | .....             | 1680 |
|                           |                   | 1,700             |                   | 1,720             |                   | 1,740             |      |
| MK144329                  | <b>GGATATGTAA</b> | <b>TTATTGGAAT</b> | <b>AATTGTTGGA</b> | <b>GACTCAAATG</b> | <b>ATGGATATGC</b> | <b>AAGCATGATA</b> | 1740 |
| MH939982.1:c106394-104178 | .....             | .....             | .....             | .....             | .....             | .....             | 1740 |
| MH939981.1:c106661-104445 | .....             | .....             | .....             | .....             | .....             | .....             | 1740 |
| KF539850.1:c100173-97957  | .....             | .....             | .....             | .....             | .....             | .....             | 1740 |
| MG678915.1:c103141-100925 | .....             | .....             | .....             | .....             | .....             | .....             | 1740 |
| MG678876.1:c103509-101293 | .....             | .....             | .....             | .....             | .....             | .....             | 1740 |
| MG678856.1:c103368-101152 | .....             | .....             | .....             | .....             | .....             | .....             | 1740 |
| MG678843.1:c103267-101051 | .....             | .....             | .....             | .....             | .....             | .....             | 1740 |
| MG678835.1:c100962-98746  | .....             | .....             | .....             | .....             | .....             | .....             | 1740 |
| KF539853.1:c98719-96503   | .....             | .....             | .....             | .....             | .....             | .....             | 1740 |
| KF539852.1:c99164-96948   | .....             | .....             | .....             | .....             | .....             | .....             | 1740 |
|                           |                   | 1,760             |                   | 1,780             |                   | 1,800             |      |
| MK144329                  | <b>ACTTATATGC</b> | <b>TGTTCTATAT</b> | <b>CTCCATGAAT</b> | <b>CTAGGAACTT</b> | <b>TTGCTTGCAT</b> | <b>TGTATTATTT</b> | 1800 |
| MH939982.1:c106394-104178 | .....             | .....             | .....             | .....             | .....             | .....             | 1800 |
| MH939981.1:c106661-104445 | .....             | .....             | .....             | .....             | .....             | .....             | 1800 |
| KF539850.1:c100173-97957  | .....             | .....             | .....             | .....             | .....             | .....             | 1800 |
| MG678915.1:c103141-100925 | .....             | .....             | .....             | .....             | .....             | .....             | 1800 |
| MG678876.1:c103509-101293 | .....             | .....             | .....             | .....             | .....             | .....             | 1800 |
| MG678856.1:c103368-101152 | .....             | .....             | .....             | .....             | .....             | .....             | 1800 |
| MG678843.1:c103267-101051 | .....             | .....             | .....             | .....             | .....             | .....             | 1800 |
| MG678835.1:c100962-98746  | .....             | .....             | .....             | .....             | .....             | .....             | 1800 |
| KF539853.1:c98719-96503   | .....             | .....             | .....             | .....             | .....             | .....             | 1800 |
| KF539852.1:c99164-96948   | .....             | .....             | .....             | .....             | .....             | .....             | 1800 |

|                           |                   |                    |                    |                   |                   |                   |      |
|---------------------------|-------------------|--------------------|--------------------|-------------------|-------------------|-------------------|------|
|                           |                   | 1,820              |                    | 1,840             |                   | 1,860             |      |
| MK144329                  | <b>GGTCTACGTA</b> | <b>CCGGAACGGA</b>  | <b>TAAACATTCGA</b> | <b>GATTATGCAG</b> | <b>GATTATACAC</b> | <b>GAAAGATCCT</b> | 1860 |
| MH939982.1:c106394-104178 | .....             | .....              | .....              | .....             | .....             | .....             | 1860 |
| MH939981.1:c106661-104445 | .....             | .....              | .....              | .....             | .....             | .....             | 1860 |
| KF539850.1:c100173-97957  | .....             | .....              | .....              | .....             | .....             | .....             | 1860 |
| MG678915.1:c103141-100925 | .....             | .....              | .....              | .....             | .....             | .....             | 1860 |
| MG678876.1:c103509-101293 | .....             | .....              | .....              | .....             | .....             | .....             | 1860 |
| MG678856.1:c103368-101152 | .....             | .....              | .....              | .....             | .....             | .....             | 1860 |
| MG678843.1:c103267-101051 | .....             | .....              | .....              | .....             | .....             | .....             | 1860 |
| MG678835.1:c100962-98746  | .....             | .....              | .....              | .....             | .....             | .....             | 1860 |
| KF539853.1:c98719-96503   | .....             | .....              | .....              | .....             | .....             | .....             | 1860 |
| KF539852.1:c99164-96948   | .....             | .....              | .....              | .....             | .....             | .....             | 1860 |
|                           |                   | 1,880              |                    | 1,900             |                   | 1,920             |      |
| MK144329                  | <b>TTTTTGGCTC</b> | <b>TCTCTTTAGC</b>  | <b>CCTATGTCTC</b>  | <b>TTATCCCTAG</b> | <b>GGGGTCTTCC</b> | <b>CCCCTAGCA</b>  | 1920 |
| MH939982.1:c106394-104178 | .....             | .....              | .....              | .....             | .....             | .....             | 1920 |
| MH939981.1:c106661-104445 | .....             | .....              | .....              | .....             | .....             | .....             | 1920 |
| KF539850.1:c100173-97957  | .....             | .....              | .....              | .....             | .....             | .....             | 1920 |
| MG678915.1:c103141-100925 | .....             | .....              | .....              | .....             | .....             | .....             | 1920 |
| MG678876.1:c103509-101293 | .....             | .....              | .....              | .....             | .....             | .....             | 1920 |
| MG678856.1:c103368-101152 | .....             | .....              | .....              | .....             | .....             | .....             | 1920 |
| MG678843.1:c103267-101051 | .....             | .....              | .....              | .....             | .....             | .....             | 1920 |
| MG678835.1:c100962-98746  | .....             | .....              | .....              | .....             | .....             | .....             | 1920 |
| KF539853.1:c98719-96503   | .....             | .....              | .....              | .....             | .....             | .....             | 1920 |
| KF539852.1:c99164-96948   | .....             | .....              | .....              | .....             | .....             | .....             | 1920 |
|                           |                   | 1,940              |                    | 1,960             |                   | 1,980             |      |
| MK144329                  | <b>GGTTTTTTCG</b> | <b>GAAAACCTCTA</b> | <b>TTTATTCTGG</b>  | <b>TGTGGATGGC</b> | <b>AGGCAGGCCT</b> | <b>ATATTTCTTG</b> | 1980 |
| MH939982.1:c106394-104178 | .....             | .....              | .....              | .....             | .....             | .....             | 1980 |
| MH939981.1:c106661-104445 | .....             | .....              | .....              | .....             | .....             | .....             | 1980 |
| KF539850.1:c100173-97957  | .....             | .....              | .....              | .....             | .....             | .....             | 1980 |
| MG678915.1:c103141-100925 | .....             | .....              | .....              | .....             | .....             | .....             | 1980 |
| MG678876.1:c103509-101293 | .....             | .....              | .....              | .....             | .....             | .....             | 1980 |
| MG678856.1:c103368-101152 | .....             | .....              | .....              | .....             | .....             | .....             | 1980 |
| MG678843.1:c103267-101051 | .....             | .....              | .....              | .....             | .....             | .....             | 1980 |
| MG678835.1:c100962-98746  | .....             | .....              | .....              | .....             | .....             | .....             | 1980 |
| KF539853.1:c98719-96503   | .....             | .....              | .....              | .....             | .....             | .....             | 1980 |
| KF539852.1:c99164-96948   | .....             | .....              | .....              | .....             | .....             | .....             | 1980 |
|                           |                   | 2,000              |                    | 2,020             |                   | 2,040             |      |
| MK144329                  | <b>GTTTTAATAG</b> | <b>GACTCCTTAC</b>  | <b>AAGCGTTGTT</b>  | <b>TCTATCTACT</b> | <b>ATTATCTAAA</b> | <b>ATAATCAAG</b>  | 2040 |
| MH939982.1:c106394-104178 | .....             | .....              | .....              | .....             | .....             | .....             | 2040 |
| MH939981.1:c106661-104445 | .....             | .....              | .....              | .....             | .....             | .....             | 2040 |
| KF539850.1:c100173-97957  | .....             | .....              | .....              | .....             | .....             | .....             | 2040 |
| MG678915.1:c103141-100925 | .....             | .....              | .....              | .....             | .....             | .....             | 2040 |
| MG678876.1:c103509-101293 | .....             | .....              | .....              | .....             | .....             | .....             | 2040 |
| MG678856.1:c103368-101152 | .....             | .....              | .....              | .....             | .....             | .....             | 2040 |
| MG678843.1:c103267-101051 | .....             | .....              | .....              | .....             | .....             | .....             | 2040 |
| MG678835.1:c100962-98746  | .....             | .....              | .....              | .....             | .....             | .....             | 2040 |
| KF539853.1:c98719-96503   | .....             | .....              | .....              | .....             | .....             | .....             | 2040 |
| KF539852.1:c99164-96948   | .....             | .....              | .....              | .....             | .....             | .....             | 2040 |
|                           |                   | 2,060              |                    | 2,080             |                   | 2,100             |      |
| MK144329                  | <b>TTATTAATGA</b> | <b>CTGGACGAAA</b>  | <b>CCAAGAAATA</b>  | <b>ACCCCTCAG</b>  | <b>TGCGAAATTA</b> | <b>TAGAAGATCT</b> | 2100 |
| MH939982.1:c106394-104178 | .....             | .....              | .....              | .....             | .....             | .....             | 2100 |
| MH939981.1:c106661-104445 | .....             | .....              | .....              | .....             | .....             | .....             | 2100 |
| KF539850.1:c100173-97957  | .....             | .....              | .....              | .....             | .....             | .....             | 2100 |
| MG678915.1:c103141-100925 | .....             | .....              | .....              | .....             | .....             | .....             | 2100 |
| MG678876.1:c103509-101293 | .....             | .....              | .....              | .....             | .....             | .....             | 2100 |
| MG678856.1:c103368-101152 | .....             | .....              | .....              | .....             | .....             | .....             | 2100 |
| MG678843.1:c103267-101051 | .....             | .....              | .....              | .....             | .....             | .....             | 2100 |
| MG678835.1:c100962-98746  | .....             | .....              | .....              | .....             | .....             | .....             | 2100 |
| KF539853.1:c98719-96503   | .....             | .....              | .....              | .....             | .....             | .....             | 2100 |
| KF539852.1:c99164-96948   | .....             | .....              | .....              | .....             | .....             | .....             | 2100 |
|                           |                   | 2,120              |                    | 2,140             |                   | 2,160             |      |
| MK144329                  | <b>CCTTTAAGAT</b> | <b>CAAACAATTC</b>  | <b>CATCGAATTG</b>  | <b>AGTATGATTG</b> | <b>TATGTGTAAT</b> | <b>AGCATCTACT</b> | 2160 |
| MH939982.1:c106394-104178 | .....             | .....              | .....              | .....             | .....             | .....             | 2160 |
| MH939981.1:c106661-104445 | .....             | .....              | .....              | .....             | .....             | .....             | 2160 |
| KF539850.1:c100173-97957  | .....             | .....              | .....              | .....             | .....             | .....             | 2160 |
| MG678915.1:c103141-100925 | .....             | .....              | .....              | .....             | .....             | .....             | 2160 |
| MG678876.1:c103509-101293 | .....             | .....              | .....              | .....             | .....             | .....             | 2160 |
| MG678856.1:c103368-101152 | .....             | .....              | .....              | .....             | .....             | .....             | 2160 |
| MG678843.1:c103267-101051 | .....             | .....              | .....              | .....             | .....             | .....             | 2160 |
| MG678835.1:c100962-98746  | .....             | .....              | .....              | .....             | .....             | .....             | 2160 |
| KF539853.1:c98719-96503   | .....             | .....              | .....              | .....             | .....             | .....             | 2160 |
| KF539852.1:c99164-96948   | .....             | .....              | .....              | .....             | .....             | .....             | 2160 |

|                           |                   | 2,180 |                   | 2,200 |                   |  |                   |  |                   |  |                |      |
|---------------------------|-------------------|-------|-------------------|-------|-------------------|--|-------------------|--|-------------------|--|----------------|------|
|                           |                   |       |                   |       |                   |  |                   |  |                   |  |                |      |
| MK144329                  | <b>ATACCAGGAA</b> |       | <b>TATCAATGAA</b> |       | <b>CCCGATTATT</b> |  | <b>GCAATTGCTC</b> |  | <b>AGGATACACT</b> |  | <b>TTTTTAG</b> | 2217 |
| MH939982.1:c106394-104178 | .....             |       | .....             |       | .....             |  | .....             |  | .....             |  | .....          | 2217 |
| MH939981.1:c106661-104445 | .....             |       | .....             |       | .....             |  | .....             |  | .....             |  | .....          | 2217 |
| KF539850.1:c100173-97957  | .....             |       | .....             |       | .....             |  | .....             |  | .....             |  | .....          | 2217 |
| MG678915.1:c103141-100925 | .....             |       | .....             |       | .....             |  | .....             |  | .....             |  | .....          | 2217 |
| MG678876.1:c103509-101293 | .....             |       | .....             |       | .....             |  | .....             |  | .....             |  | .....          | 2217 |
| MG678856.1:c103368-101152 | .....             |       | .....             |       | .....             |  | .....             |  | .....             |  | .....          | 2217 |
| MG678843.1:c103267-101051 | .....             |       | .....             |       | .....             |  | .....             |  | .....             |  | .....          | 2217 |
| MG678835.1:c100962-98746  | .....             |       | .....             |       | .....             |  | .....             |  | .....             |  | .....          | 2217 |
| KF539853.1:c98719-96503   | .....             |       | .....             |       | .....             |  | .....             |  | .....             |  | .....          | 2217 |
| KF539852.1:c99164-96948   | .....             |       | .....             |       | .....             |  | .....             |  | .....             |  | .....          | 2217 |
